# Supplementary material for: Diagnosis of the Condition of Aquatic Ecosystems Using a Partial Assessment of Ecological and Trophic States: An Example of Small Lakes in Northern Poland
Source: MDPI journal article supplement (doi:10.3390/limnolrev24010006), 2024-03-01
Supplement: s1 [file s1]

Table S1. Individuals of major meiobenthic taxa for sampling stations, N – all individuals of sampling stations, F – frequency for sampling stations of the lake, F<sub>t</sub> – frequency for all stations.

| Lake              | Station number | Turbellaria | Rotifera | Nematoda | Oligochaeta | Cladocera | Ostracoda | Copepoda | Diptera larvae | Insecta larvae | Tardigrada | Arachnida | Bivalvia | Gastropoda | N    |
|-------------------|----------------|-------------|----------|----------|-------------|-----------|-----------|----------|----------------|----------------|------------|-----------|----------|------------|------|
| Święte            | 1              | 17          | 1        | 95       | 5           |           | 25        | 4        | 4              | 2              |            |           |          | 1          | 154  |
|                   | 2              | 3           |          |          |             | 1         | 26        | 5        | 3              | 4              | 2          |           |          | 1          | 45   |
|                   | 3              | 4           | 2        | 4        | 3           | 1         | 8         | 10       | 6              | 2              | 1          |           |          | 2          | 43   |
|                   | 4              | 3           |          |          | 2           |           | 9         |          |                |                |            |           |          |            | 14   |
|                   | 5              | 2           |          | 12       | 8           |           | 20        | 7        | 6              | 4              |            |           |          | 4          | 63   |
|                   | 6              | 22          | 19       | 153      | 8           | 13        | 26        | 21       | 7              | 1              |            | 3         |          |            | 273  |
|                   | F              | 1           | 0.50     | 0.50     | 0.83        | 0.50      | 1         | 0.83     | 0.83           | 0.83           | 0.33       | 0.17      | 0        | 0.67       | 592  |
| Ocypelek          | 1              |             | 1        | 14       | 3           |           |           | 2        | 8              |                | 1          |           |          |            | 29   |
|                   | 2              | 3           |          | 12       | 2           |           | 3         | 3        | 1              |                |            | 3         | 1        |            | 28   |
|                   | 3              | 4           |          |          |             |           |           | 3        |                |                |            | 1         |          |            | 8    |
|                   | 4              | 7           | 1        | 5        | 1           | 2         |           | 2        | 3              | 1              |            |           |          |            | 22   |
|                   | F              | 0.75        | 0.50     | 0.75     | 0.75        | 0.25      | 0.25      | 1        | 0.75           | 0.25           | 0.25       | 0.50      | 0.25     | 0          | 87   |
| Czarne Południowe | 1              | 1           |          | 17       |             | 1         |           | 3        |                | 1              |            |           |          |            | 23   |
|                   | 2              | 7           |          | 43       |             | 7         |           | 9        | 4              | 4              | 5          |           | 5        |            | 84   |
|                   | 3              | 6           | 2        | 30       | 1           | 13        |           | 20       | 10             |                | 6          | 1         |          | 8          | 97   |
|                   | 4              | 23          | 17       | 135      | 2           | 82        | 28        | 93       | 26             | 19             | 31         | 1         | 23       | 64         | 544  |
|                   | 5              | 86          | 15       | 32       |             | 9         | 58        | 9        | 2              |                | 16         | 1         | 4        | 1          | 233  |
|                   | 6              | 27          | 10       | 35       |             | 46        | 21        | 6        | 1              |                | 1          | 1         | 3        |            | 151  |
|                   | 7              | 15          | 5        | 9        | 1           | 1         | 8         | 3        | 2              |                | 4          | 1         | 1        | 2          | 55   |
|                   | 8              | 11          | 7        | 5        |             | 35        | 9         | 5        |                |                |            | 1         |          |            | 73   |
|                   | 9              | 9           | 4        | 8        |             | 3         | 2         | 29       | 2              | 3              | 2          |           | 2        |            | 64   |
|                   | 10             | 27          |          | 24       |             | 44        | 17        | 19       | 11             | 6              | 10         | 1         | 3        |            | 162  |
|                   | F              | 1           | 0.70     | 1        | 0.30        | 1         | 0.70      | 1        | 0.80           | 0.50           | 0.80       | 0.70      | 0.70     | 0.40       | 1483 |
| Kałężie           | 1              | 17          | 2        | 10       |             | 5         | 4         | 9        | 10             |                | 5          |           |          |            | 62   |
|                   | 2              | 5           | 5        | 66       |             | 46        |           | 26       | 10             |                | 59         | 2         |          | 19         | 240  |
|                   | 3              | 3           | 1        | 8        | 6           | 5         |           |          | 3              |                | 5          |           |          |            | 31   |
|                   | 4              | 4           | 1        | 28       |             |           | 3         | 6        | 14             | 4              | 6          |           |          | 4          | 70   |
|                   | 5              | 19          | 5        | 145      | 3           | 23        | 2         | 18       | 15             | 1              | 28         | 1         | 2        | 40         | 303  |
|                   | 6              | 8           | 1        | 13       |             |           |           | 3        | 7              | 1              | 1          |           |          | 1          | 29   |
|                   | F              | 1           | 1        | 1        | 0.33        | 0.67      | 0.50      | 0.83     | 1              | 0.50           | 1          | 0.33      | 0.17     | 0.67       | 738  |
|                   | F <sub>t</sub> | 0.96        | 0.69     | 0.88     | 0.50        | 0.69      | 0.65      | 0.92     | 0.92           | 0.54           | 0.65       | 0.46      | 0.35     | 0.46       |      |
